# Supplementary material
Source: MDPI journal article supplement (https://www.mdpi.com/2223-7747/13/7/1028)
Supplement: s1 [file s1]

Mar. 18, 2024

RE: plants-2903077

Dear editor:

Thank you very much for your attention on our manuscript (plants-2903077) entitled “Physiological and proteomic analysis of a *mtn1* (*more tillering number 1*) mutant reveal key players in centipedegrass tillering development”. We thank you and both reviewers very much for the critical and constructive comments on our manuscript.

The comments from reviewers not only helped us with the improvement of our manuscript, but also suggested some neat ideas for our studies. Based on the comments and suggestions we received, careful modifications have now been made to the original manuscript, and all changes are highlighted. After addressing all the issues raised, we feel the quality of the paper is much improved and hope that our new manuscript will meet with approval.

We appreciate your consideration of our manuscript. If you have any questions, please do not hesitate to contact me at the address below.

Sincerely,

Li Ling

Institute of Botany, Jiangsu Province and Chinese Academy of Sciences

Zhongshanmenwai Qianhuahoucun, No. 1, Nanjing 210014, China

E-mail: liling7168@163.com
