# Supplementary material for: Physiological and Proteomic Analyses of mtn1 Mutant Reveal Key Players in Centipedegrass Tiller Development
Source: MDPI journal article supplement (doi:10.3390/plants13071028), 2024-04-04
Supplement: s1 [file s1]

**Table S2.** Differentially abundant proteins (DAPs) in tillering bud and stolon of *mtn1* mutant involved in plant hormone signal transduction pathway.

| Position   | Hormone | Protein ID           | Fold change | P value | Protein description                                        |
|------------|---------|----------------------|-------------|---------|------------------------------------------------------------|
| Tiller bud | Auxin   | evm.model.ctg779.14  | 32          | 0       | Auxin transport protein BIG                                |
|            |         | evm.model.ctg249.48  | -16.61      |         | IAA-amino acid hydrolase, ILR1-like 9                      |
|            | GAs     | evm.model.ctg402.179 | 5           | 0       | ent-Kaurene oxidase, KO                                    |
|            |         | evm.model.ctg639.14  | -16.61      | 0       | Geranylgeranyl diphosphate synthase, GGPS                  |
|            |         | evm.model.ctg216.88  | 5           | 0       | Gibberellin receptor, GID1L                                |
|            | BRs     | evm.model.ctg206.24  | 1.39        | 0.001   | Typhasterol/6-deoxotyphasterol 2alpha-hydroxylase, CYP92A6 |
| Stem node  |         | evm.model.ctg315.194 | -1.63       | 0       | BR-signaling kinase                                        |
|            | Auxin   | evm.model.ctg83.129  | -1.22       | 0.038   | Auxin influx carrier, AUX1/LAX                             |
|            |         | evm.model.ctg381.508 | -16.61      | 0       | Indole-3-acetaldehyde oxidase, AAO                         |
|            | GAs     | evm.model.ctg216.88  | 5           | 0       | Gibberellin receptor, GID1L2                               |
|            |         | evm.model.ctg397.145 | -16.61      | 0       | Geranylgeranyl diphosphate synthase, GGPS                  |
|            | BRs     | evm.model.ctg781.114 | 2.81        | 0       | Xyloglucosyl transferase, TCH4                             |
|            |         | evm.model.ctg315.194 | -1.63       | 0       | BR-signaling kinase                                        |
