# Supplementary material for: Physiological and Proteomic Analyses of mtn1 Mutant Reveal Key Players in Centipedegrass Tiller Development
Source: MDPI journal article supplement (doi:10.3390/plants13071028), 2024-04-04
Supplement: s1 [file s1]

**Table S4.** Primer sequences of genes used for qRT-PCR.

| Primer name        | Primer sequence (5'-3')   |
|--------------------|---------------------------|
| <i>Eo</i> -Actin-F | CTCGTATTCCTCCTTTGTGTGG    |
| <i>Eo</i> -Actin-R | GAAGATAGTGGATGAGCGTGTTG   |
| <i>CYP92A6</i> -F  | TGGAGACTTCCCGATGGCA       |
| <i>CYP92A6</i> -R  | CAAGCCTCGGCGTAGAGGTG      |
| <i>RBOH</i> -F     | CGTGAAGGATGTACTTAACCATATT |
| <i>RBOH</i> -R     | TGCATCCCCTTCCTCGTACA      |
| <i>ENO</i> -F      | GCAAGGACCCTATGGCTCAA      |
| <i>ENO</i> -R      | ATGTGCCGGTACAGAGGAAT      |
| <i>GLU</i> -F      | GACAAGTACGGCGGATTCCT      |
| <i>GLU</i> -R      | GCATGGGCTCTGAGAAGGTT      |
| <i>IPMK</i> -F     | GTCGCATCAAGCGGAGGTAA      |
| <i>IPMK</i> -R     | CTGCGTCTGAGGAGGAGTCT      |
| <i>TIP</i> -F      | TGGGACAACCACTGGGTCTA      |
| <i>TIP</i> -R      | TCAGTAGTCTGTGGTTGGCAG     |
| <i>AUX1/LAX</i> -F | GGTCAGGTGGAAGGTGTGAC      |
| <i>AUX1/LAX</i> -R | GGTCAGGTGGAAGGTGTGAC      |
