# Supplementary material for: Physiological and Proteomic Analyses of mtn1 Mutant Reveal Key Players in Centipedegrass Tiller Development
Source: MDPI journal article supplement (doi:10.3390/plants13071028), 2024-04-04
Supplement: s1 [file s1]

**Table S3.** Differentially abundant proteins (DAPs) involved in starch and sucrose metabolism.

| Position   | Protein ID           | Fold change | P value | Protein description                               |
|------------|----------------------|-------------|---------|---------------------------------------------------|
| Tiller bud | evm.model.ctg415.34  | 1.736       | 0.002   | Beta-glucosidase, GLU                             |
|            | evm.model.ctg657.24  | 5           | 0       | 1,4- $\alpha$ -glucan branching enzyme, GBE1      |
|            | evm.model.ctg461.16  | -1.385      | 0.001   | Glycosyl hydrolase family 9, GH9                  |
|            | evm.model.ctg280.94  | -1.995      | 0.003   | Beta-amylase, $\beta$ AMY                         |
| Stem node  | evm.model.ctg238.107 | 5           | 0       | Beta-amylase, $\beta$ AMY                         |
|            | evm.model.ctg288.2   | 5           | 0       | Trehalose-6-phosphate synthase, TPS               |
|            | evm.model.ctg461.16  | 5           | 0       | endo-1,4- $\beta$ -D-glucanohydrolase, GN         |
|            | evm.model.ctg589.69  | 5           | 0       | Alpha-trehalose-phosphate synthase, $\alpha$ -TPS |
|            | evm.model.ctg657.24  | 5           | 0       | 1,4- $\alpha$ -glucan branching enzyme, GBE1      |
|            | evm.model.ctg415.34  | 2.357       | 0.00136 | Beta-glucosidase, GLU                             |
